# Supplementary material for: A rigid plant oil-based thermoset with a furfural-derived cyclobutane cross-linker
Source: Royal Society of Chemistry journal article supplement (doi:10.1039/d0gc04323k), 2021-01-01
Supplement: d0gc04323k1.pdf [file d0gc04323k1.pdf]

# A rigid plant oil-based thermoset with a furfural-derived cyclobutane cross-linker.

Jonathan Tellers<sup>a</sup>, Nicolas Sbirrazzuoli<sup>a</sup>, and Nathanael Guigo<sup>\*a</sup>

<sup>a</sup>Institut de Chimie de Nice, Université Côte d'Azur, CNRS, UMR 7272, 06108 Nice, France.  
E-mail : [Nathanael.GUIGO@univ-cotedazur.fr](mailto:Nathanael.GUIGO@univ-cotedazur.fr);

## Supporting information

Figures:

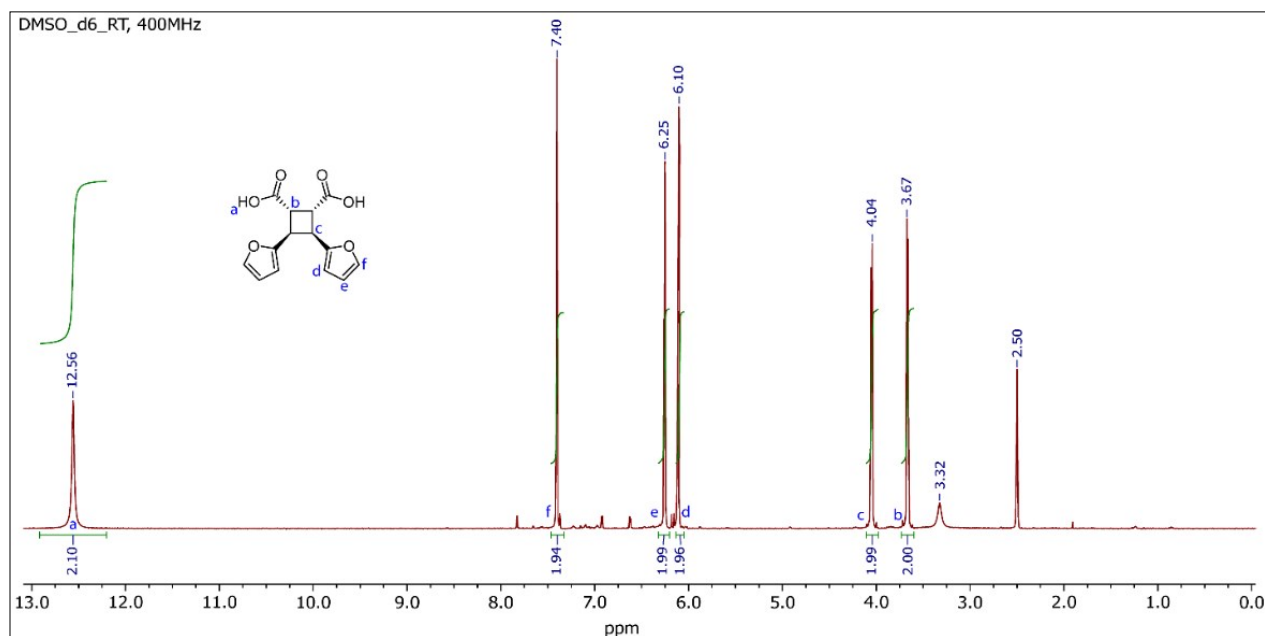

Figure S1. <sup>1</sup>H-NMR spectrum of CBDA-2 (400 MHz, DMSO<sub>d6</sub>, RT).

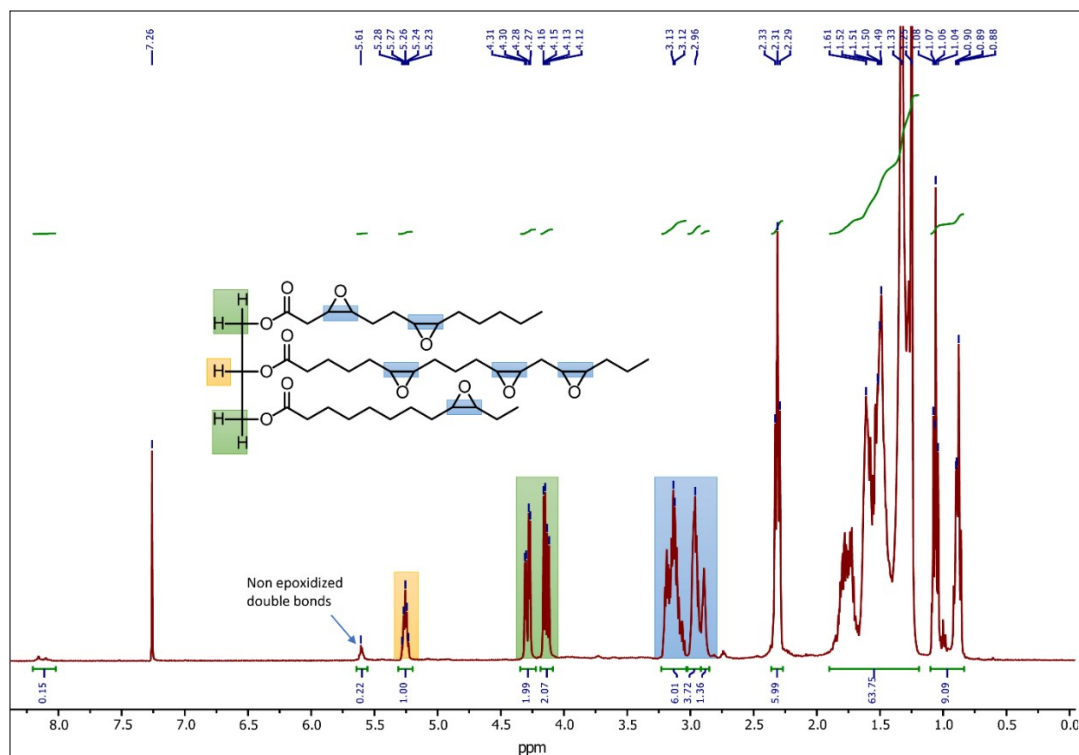

**Figure S2.**  $^1\text{H-NMR}$  spectrum in  $\text{CDCl}_3$  of ELO batch used in this study.

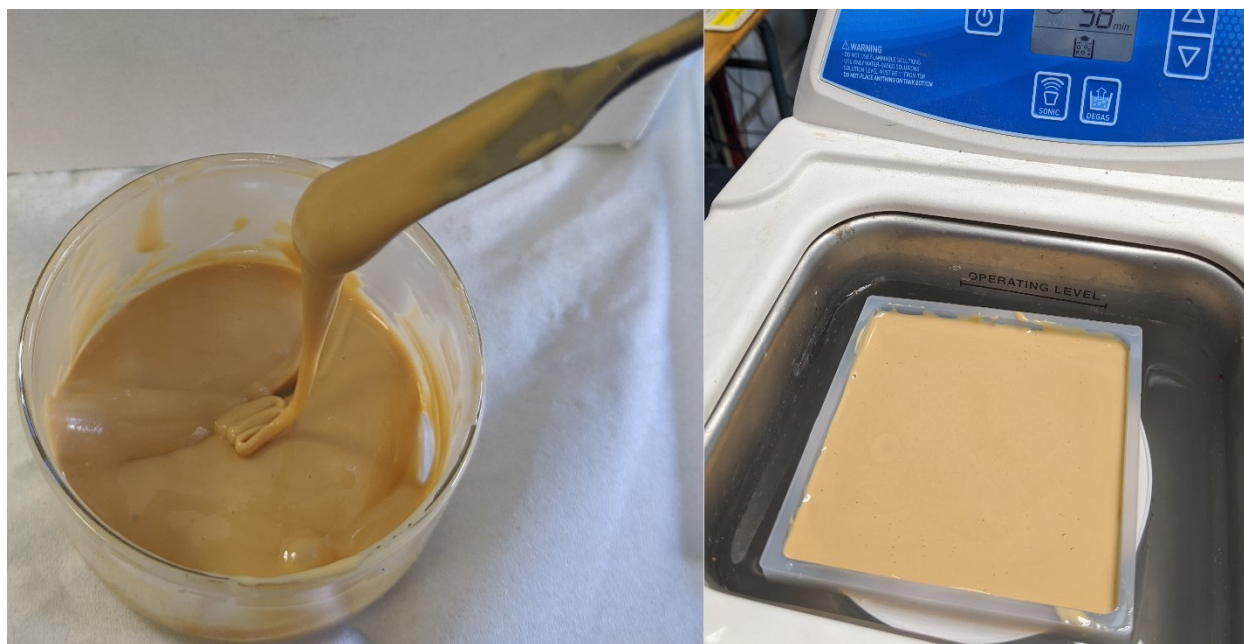

**Figure S3.** Image of the CBDA-2/ELO slush after mixing (left) and filled rectangular mold inside the sonicator (right). The mold was elevated such that only the bottom half was immersed in water.

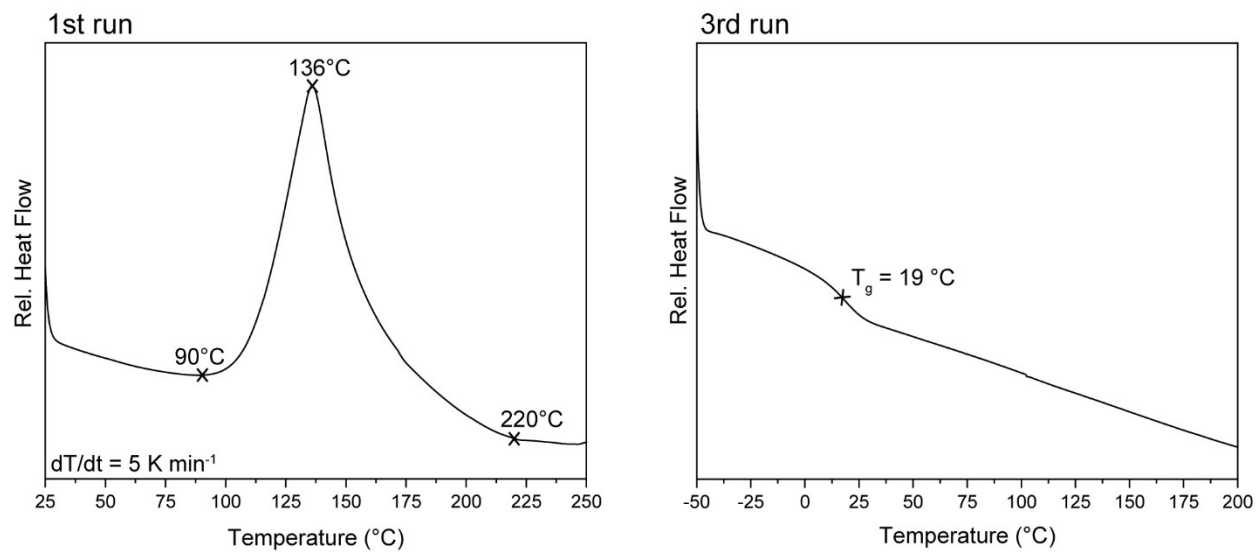

**Figure S4.** DSC-Scan of a mixture of CBDA-2/ELO ( $R_{\text{ELO}} = 0.8$ ) scanned from 25 °C to 250 °C at 5 K min<sup>-1</sup> (1st run, curing) and from -50 °C to 200 °C (3<sup>rd</sup> run, determination of  $T_g$ ). Crosses highlight onset, peak, endset, and glass transition temperature.

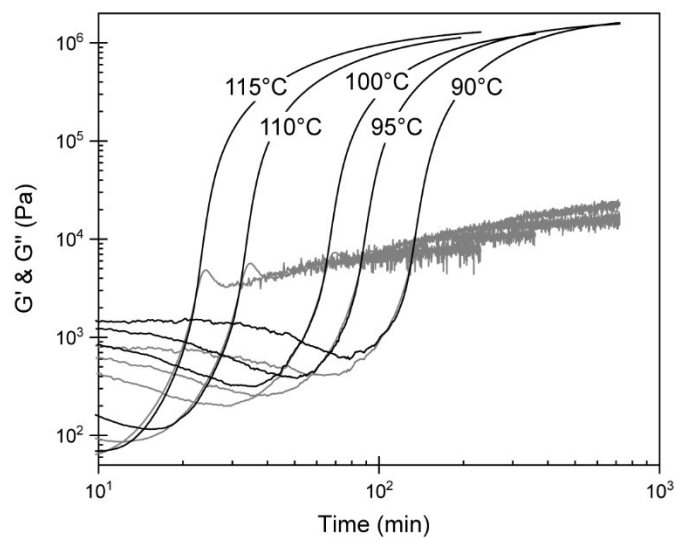

**Figure S5.** Storage ( $G'$ ) and Loss ( $G''$ ) modulus as a function of time for different isothermal curing temperatures (90 °C, 95 °C, 100 °C, 110 °C, and 115 °C).

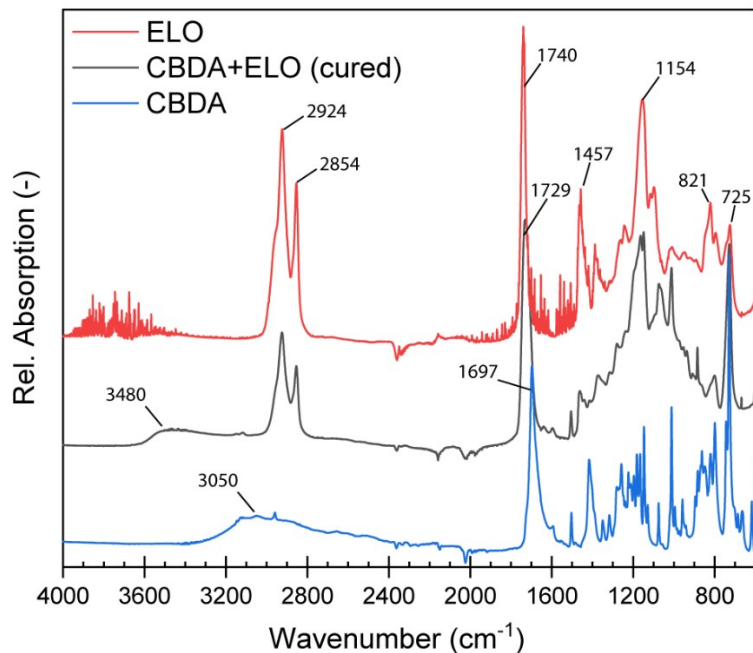

**Figure S6.** IR-spectra of epoxidized linseed oil (ELO, top), cyclobutene-1,3-diacid (CBDA-2, bottom), and of ELO cured with CBDA-2 (middle).

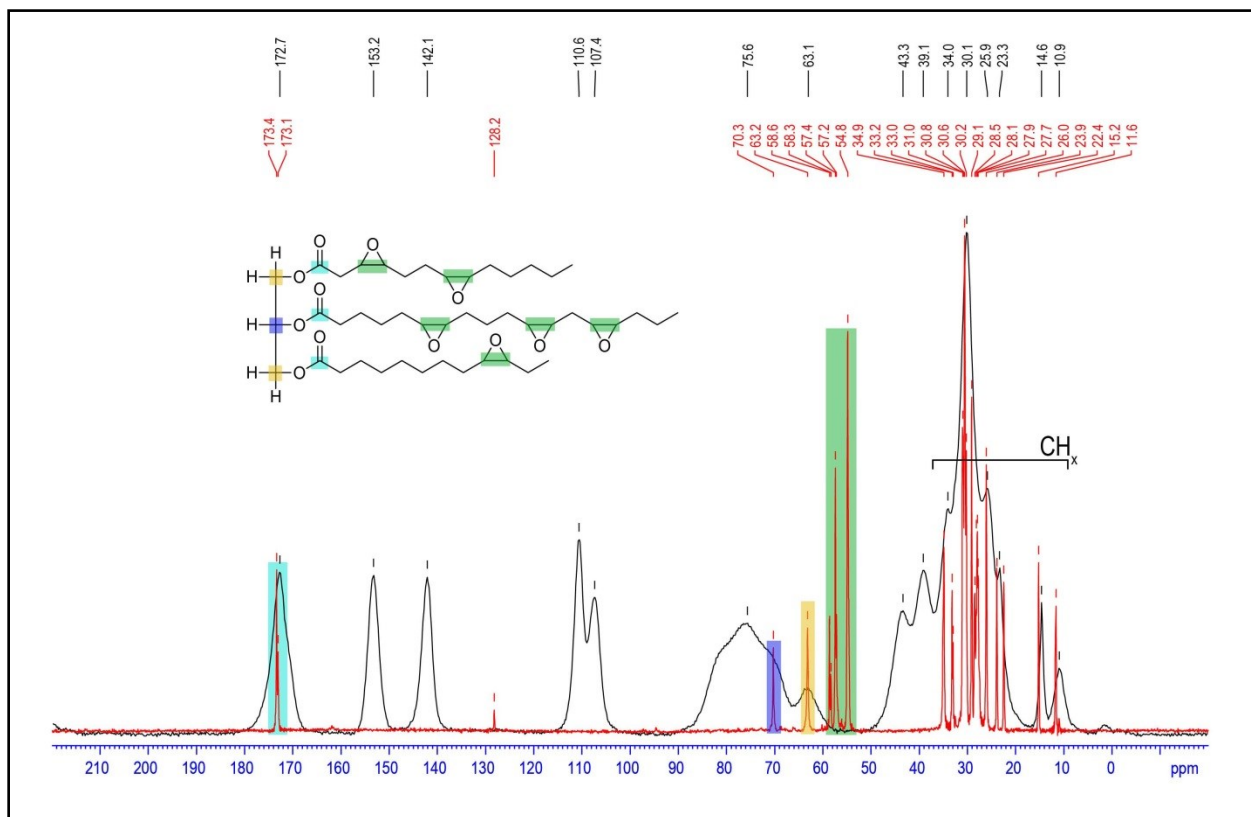

**Figure S7.**  $^{13}\text{C}$  solid-state NMR of ELO (red line) and cured ELO-CBDA-2 (black line).

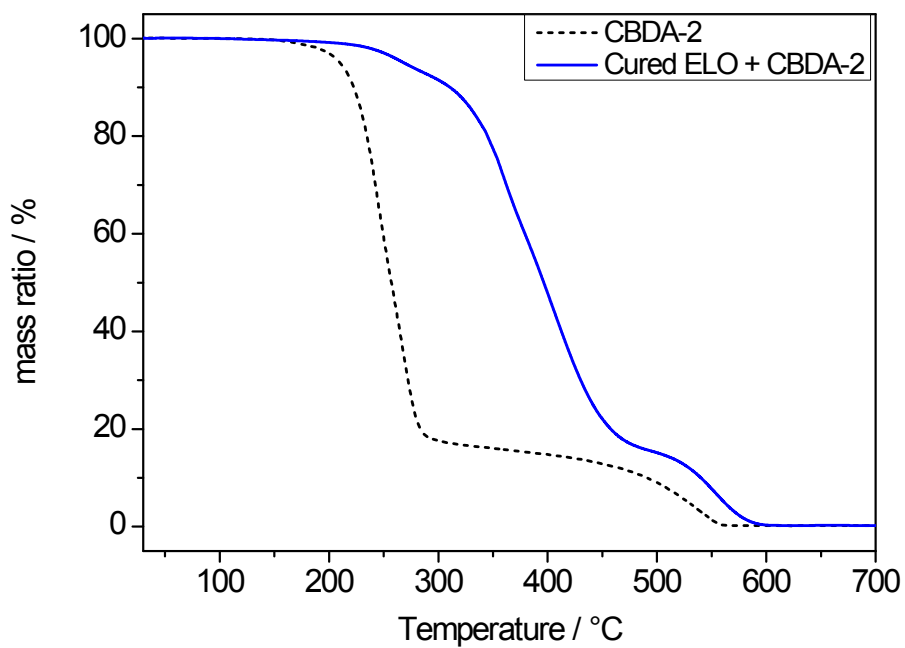

**Figure S8.** TGA scans of CBDA-2 (dot black line) and cured ELO-CBDA-2 samples (blue solid line) measured at 10 °C/min under air flow.

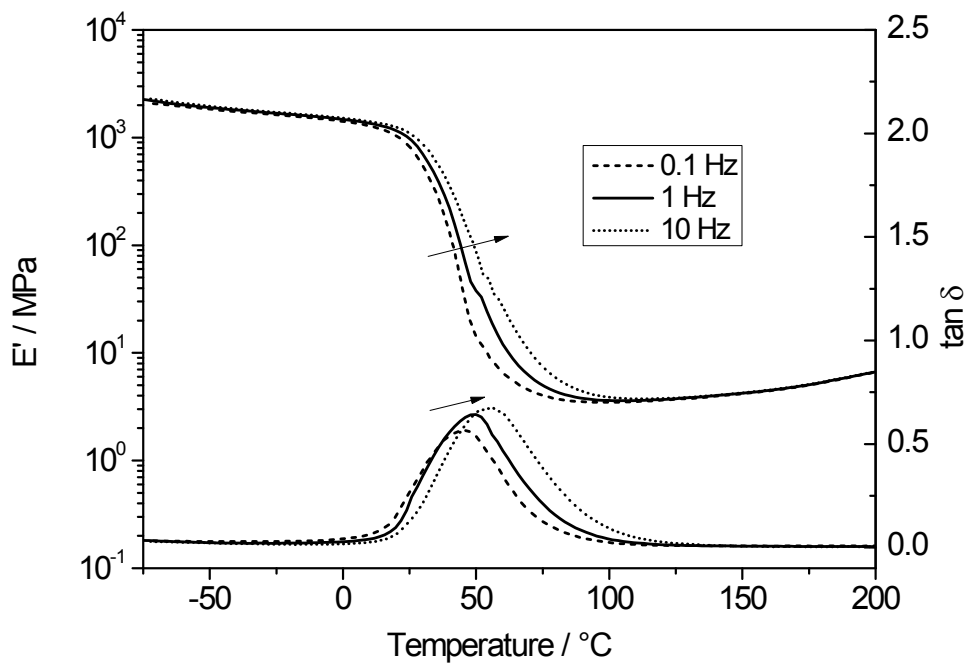

**Figure S9.** Multi-frequency DMTA scans of cured ELO-CBDA samples measured at 1 °C/min.
